# Supplementary material for: Assessment of Awareness of Infection Prevention Against Covid19 Among Staffs of Two Selected Public Hospitals In Somali Region Eastern Ethiopia.
Source: Research Square preprint supplement (doi:10.21203/rs.3.rs-8725156/v1), 2026-02-02
Supplement: Supplementary file 1 [file bf34b8f17061bfd99e9e5688.docx]

# Annex1:- Questionnaires Form

English version Questionnaires Form

This questionnaire is prepared for collecting information on the assessment of awareness and prevention against Covid19 among health care workers of public health facilities in Jarar zone, Somali Region, Eastern Ethiopia 2020

**Part 1: Socio demographic and economic factors**

| **No** | **Questions** | **Responses** | **Skip to** |
| --- | --- | --- | --- |
|  | Age group | 1. 18-30 years 2. 31-45 years 3. >45 years |  |
|  | Gender | 1. Male 2. Female |  |
|  | Profession of the health worker | 1. Doctors 2. Public health officers 3. Bsc Nursing 4. Bsc Midwifery 5. Clinical nurse level IV 6. Midwifery level IV 7. Pharmacist 8. Laboratory technician 9. Others |  |
|  | Ethnicity of the health worker | 1. Somali  2. Oromo  3. Amhara  4. Tigray  5. Other, specify_____ |  |
|  | Religion of the health worker | 1. Muslim  2. Orthodox  3. Protestant  4. Catholic  5. Other specify________ |  |
|  | Marital status of the health worker | 1. Married  2. Divorced  3. Widowed  4. Single  5. Other, specify________ |  |
|  | Source of information | 1. Websites and social media 2. News 3. Media(TV/video, magazines,newspapers, and radio) 4. social media (Face book, Twitter,Whatsapp,YouTube, Instagram, Snapchat) |  |
|  | Work experience of the health worker | ___________ |  |

**Part two: awareness and prevention of related self questionnaire**

|  | The virus causing COVID 19 infection is called | 1. Severe acute respiratory syndrome coronavirus SARS 2. Severe acute respiratory syndrome coronavirus -2 (SARS covid2) 3. Cvid19n2 4. Both B and C 5. Both A And C |  |
| --- | --- | --- | --- |
|  | First report of cases were from Wuhan city in Hubei province | 1. True 2. False |  |
|  | The main mode of transmission of virus from person to person via | 1. Respiratory droplets 2. Spread from contaminated objects or surfaces |  |
|  | Which of the following is considered as close contact? | 1. Being approximately 10 feet (3 meters) of a patient with COVID 19 for a prolonged time of period. 2. Being approximately 6 feet (2 meters) of a patient with COVID 19 for a prolonged time of period. 3. Having direct contact with infectious secretion (serum, sputum, blood) with a patient of COVID 19. 4. Both B and C 5. Both A And C |  |
|  | Reported illness have arranged from mild to severe symptoms of cough, fever, breathlessness which can appear 2-14 days after exposure. For which of the following situation indicated for medical advice | 1. Have been in close contact with a person with known to have COVID 19 2. Currently residing in an area with ongoing COVID 19 infection 3. Recent travel from an area with ongoing the spread of COVID 19 4. All of the above |  |
|  | Did you receive formal training in hand hygiene in the last three years | 1. True 2. False |  |
|  | Which of the following hand hygiene actions prevent the transmission of the virus to the health workers | 1. After touching the patient 2. Immediately after the exposure of body fluids 3. After exposure to immediate surroundings of the patients 4. Before putting on and upon removal of personal protective equipment(PPE) 5. All of the above |  |
|  | Preferred method for hand hygiene for visibly soiled hand is | 1. Hand rub with soap and water at least for 10 seconds 2. Hand rub with soap and water at least for 20 seconds 3. Use of alcohol based hand sanitizer with at least 60% alcohol |  |
|  | Use of face mask is not essential in which of the following groups | 1. People who are well, to protect themselves from COVID19 infection 2. Being in close contact of a person suspected of or known to have COVID 19 infection 3. Health care professionals |  |
|  | Which of the following is the most effective method for prevention of COVID 19 infection in heath setting area | 1. Avoid exposure (use standard precaution, contact precautions, and airborne precaution and eye protections when caring for patient with confirmed or possible COVID 19. 2. Vaccination |  |
|  | What personal protective equipment PPE should be worn by individuals transporting patients who are confirmed with or under investigation for COVID 19 within health care facility | 1. Gown 2. Gloves 3. Eye protective 4. Respirator N95mask 5. All of the above |  |
|  | What PPE should be worn by HCP providing care to asymptomatic patients with history of exposure to COVID 19 who are being evaluated for a noninfectious complaints | 1. Gown 2. Gloves 3. Eye protective 4. Respirator N95mask 5. All of the above |  |
|  | Which of the following is recommended for isolation of patients with confirmed COVID 19and those under investigation for COVID 19? | 1. Airborne infection isolation room (AIIR) with exhausted 2. Airborne infection isolation room (AIIR) without exhausted |  |
|  | Which of the following are recommended infection control measures upon arrival of a patient with suspected COVID 19 infection? | 1. Rapid triage of symptomatic patients 2. Implement respiratory hygiene and mouth etiquette( placing a facemask over the patients nose and mouth if that has not already been done 3. Have a separate, well ventilated space that allows waiting symptomatic patients to be separated by 6 or more feet. 4. All of the above |  |
|  | Clinical management includes prompt implementation of recommended of infection prevention and control measures and supportive management of complications. No specific treatment for COVID 19 is currently available. | 1. True 2. False |  |
|  | A recommended infection prevention and control measures is to perform aerosol generating procedures, including collection of diagnostic respiratory specimens, in an AIIR(Airborne infection isolation room) | 1. True 2. False |  |
