# Supplementary material for: Assessment of Awareness of Infection Prevention Against Covid19 Among Staffs of Two Selected Public Hospitals In Somali Region Eastern Ethiopia.
Source: Research Square preprint supplement (doi:10.21203/rs.3.rs-8725156/v1), 2026-02-02
Supplement: Supplementary file 1 [file f34620238719b88e441970ed.pdf]

JIGJIGA UNIVERSITY

INSTITUTE OF HEALTH SCIENCE

Research and Health Research Ethics Office

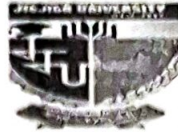

ጅግጅጋ ዩኒቨርሲቲ

የጤና ሳይንስ ኢንስቲትዩት

የምርምር ፣ እና የቴክኖሎጂ ሽግግር ጽ/ቤት

Subject: Ethical Approval

PI : Amin Ugas Mahad

**PROJECT TITLE:** "Assessment of Awareness of Infection Prevention Against Covid19 Among Staffs of Two Selected Public Hospitals In Somali Region Eastern Ethiopia, 2020

IHRRC no. 58/2020

This is to inform you that the project **Assessment of Awareness of Infection Prevention Against Covid19 Among Staffs of Two Selected Public Hospitals In Somali Region Eastern Ethiopia, 2020** has been reviewed and approved according to the Helsinki Declaration by institution of Research Review Committee of institute of Health Science, Jigjiga University on June 10, 2020.

The committee kindly requested the concerned bodies to support the above author for this research process.

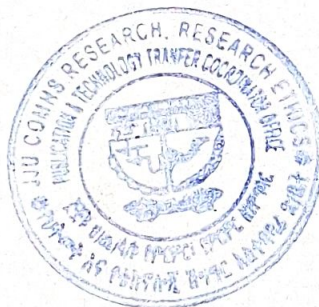

with Regard   
Abdurahman Kedir Roble  
አ.ባ.ሩህማን ክድር ሮብሌ  
Assistant Professor  
ረዳት ፕሮፌሰር  
IRC Chairperson
